# Supplementary material for: Male Sexual Preference for Female Swimming Activity in the Guppy (<em>Poecilia reticulata</em>)
Source: Preprints.org preprint supplement (doi:10.20944/preprints202101.0338.v1), 2021-01-18

**Picture for Animation 1**

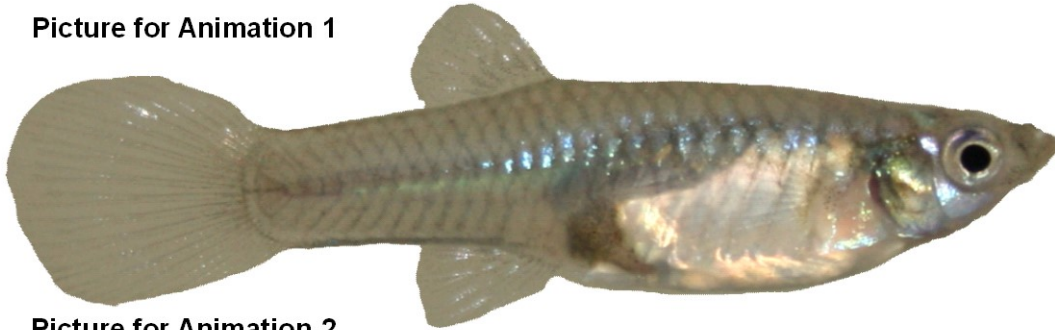

**Picture for Animation 2**

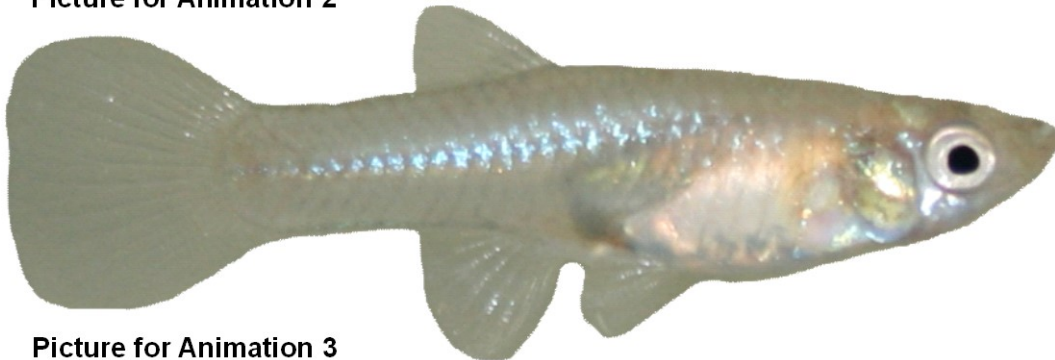

**Picture for Animation 3**

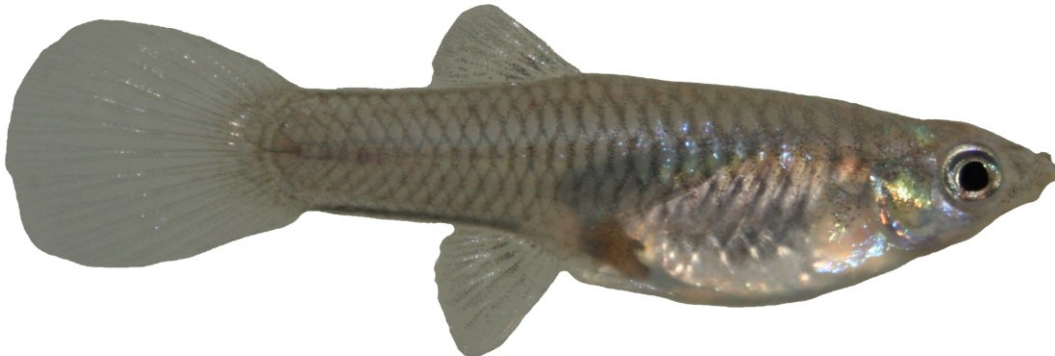

**Picture for Animation 4**

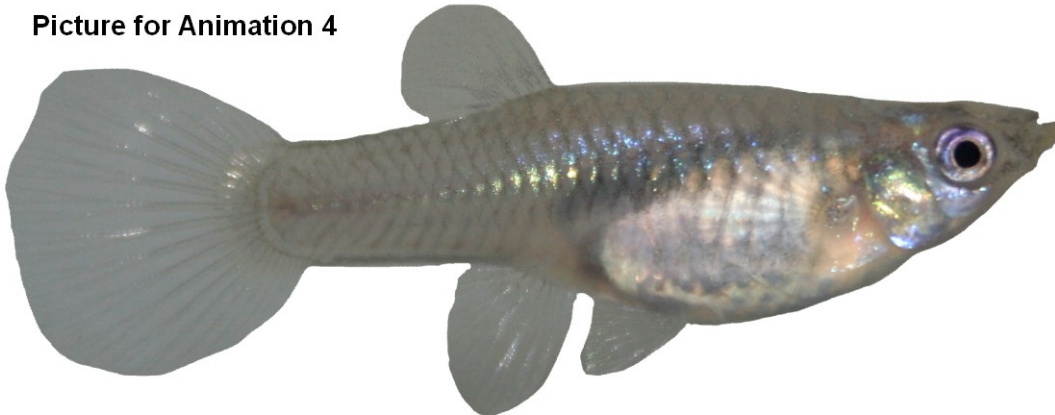

**Picture for Animation 5**

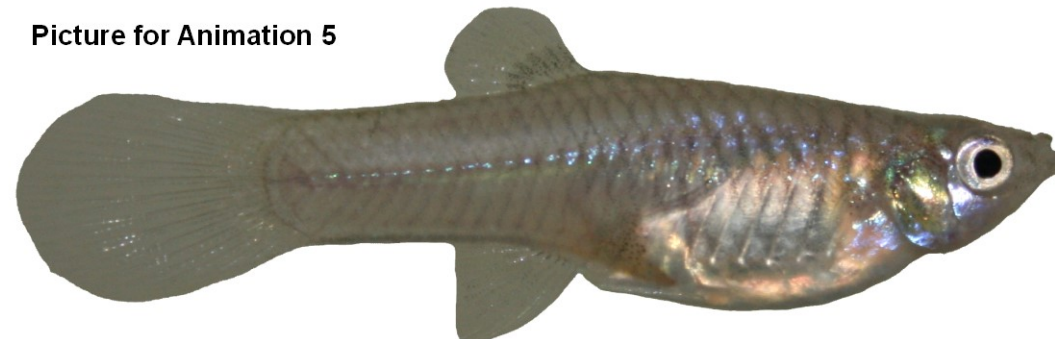

Supplement: Supplementary file 1 [file supplementary]
